# Supplementary material for: The coupling and competition of crystallization and phase separation, correlating thermodynamics and kinetics in OPV morphology and performances
Source: PubMed Central journal article supplement (PMC7804468; doi:10.1038/s41467-020-20515-3), 2021-01-12
Supplement: 41467_2020_20515_MOESM3_ESM.pdf [file 41467_2020_20515_MOESM3_ESM.pdf]

## Solar Cells Reporting Summary

Nature Research wishes to improve the reproducibility of the work that we publish. This form is intended for publication with all accepted papers reporting the characterization of photovoltaic devices and provides structure for consistency and transparency in reporting. Some list items might not apply to an individual manuscript, but all fields must be completed for clarity.

For further information on Nature Research policies, including our [data availability policy](#), see [Authors & Referees](#).

### ► Experimental design

#### Please check: are the following details reported in the manuscript?

##### 1. Dimensions

- Area of the tested solar cells  Yes See "Device fabrication and characterization" in Supplementary Information.  
 No
- Method used to determine the device area  Yes The area of our device was certified at National Institute of Metrology, China (NIM).  
 No

##### 2. Current-voltage characterization

- Current density-voltage (J-V) plots in both forward and backward direction  Yes Both forward and backward scans were conducted, which yielded identical results.  
 No
- Voltage scan conditions  Yes See "Device fabrication and characterization" in Supplementary Information.  
*For instance: scan direction, speed, dwell times*  
 No
- Test environment  Yes See "Device fabrication and characterization" in Supplementary Information.  
*For instance: characterization temperature, in air or in glove box*  
 No
- Protocol for preconditioning of the device before its characterization  Yes No preconditioning protocol.  
 No
- Stability of the J-V characteristic  Yes The stability were obtained by tracking the maximum output power point.  
*Verified with time evolution of the maximum power point or with the photocurrent at maximum power point; see ref. 7 for details.*  
 No

##### 3. Hysteresis or any other unusual behaviour

- Description of the unusual behaviour observed during the characterization  Yes No hysteresis or other unusual behaviour was observed during the characterization of the solar cells. In general, organic solar cells do not have hysteresis problems.  
 No
- Related experimental data  Yes No hysteresis or other unusual behaviour was observed during the characterization of the solar cells.  
 No

##### 4. Efficiency

- External quantum efficiency (EQE) or incident photons to current efficiency (IPCE)  Yes The EQE measurements were conducted. The integrated response under the standard reference spectrum are quite comparable to the response measured under the simulator with a error less than 5%.  
 No
- A comparison between the integrated response under the standard reference spectrum and the response measure under the simulator  Yes The EQE measurements were conducted. The integrated response under the standard reference spectrum are quite comparable to the response measured under the simulator with a error less than 5%.  
 No
- For tandem solar cells, the bias illumination and bias voltage used for each subcell  Yes Devices are single solar cells structure only.  
 No

##### 5. Calibration

- Light source and reference cell or sensor used for the characterization  Yes See "Device fabrication and characterization" in Supplementary Information.  
 No
- Confirmation that the reference cell was calibrated and certified  Yes See "Device fabrication and characterization" in Supplementary Information.  
 No

|                                                                                                                                                                                               |                                                                        |                                                                                                                                                                       |
|-----------------------------------------------------------------------------------------------------------------------------------------------------------------------------------------------|------------------------------------------------------------------------|-----------------------------------------------------------------------------------------------------------------------------------------------------------------------|
| Calculation of spectral mismatch between the reference cell and the devices under test                                                                                                        | <input checked="" type="checkbox"/> Yes<br><input type="checkbox"/> No | The spectral mismatch factor has been included in testing.                                                                                                            |
| 6. Mask/aperture                                                                                                                                                                              |                                                                        |                                                                                                                                                                       |
| Size of the mask/aperture used during testing                                                                                                                                                 | <input checked="" type="checkbox"/> Yes<br><input type="checkbox"/> No | See "Device fabrication and characterization" in Supplementary Information.                                                                                           |
| Variation of the measured short-circuit current density with the mask/aperture area                                                                                                           | <input type="checkbox"/> Yes<br><input checked="" type="checkbox"/> No | Variation is small.                                                                                                                                                   |
| 7. Performance certification                                                                                                                                                                  |                                                                        |                                                                                                                                                                       |
| Identity of the independent certification laboratory that confirmed the photovoltaic performance                                                                                              | <input type="checkbox"/> Yes<br><input checked="" type="checkbox"/> No | We did not confirm the photovoltaic performance from independent certification laboratories, as our aim is not to develop new devices or break efficiency record.     |
| A copy of any certificate(s)<br><i>Provide in Supplementary Information</i>                                                                                                                   | <input type="checkbox"/> Yes<br><input checked="" type="checkbox"/> No | No copy is provided as we did not confirm the photovoltaic performance from independent certification laboratories.                                                   |
| 8. Statistics                                                                                                                                                                                 |                                                                        |                                                                                                                                                                       |
| Number of solar cells tested                                                                                                                                                                  | <input checked="" type="checkbox"/> Yes<br><input type="checkbox"/> No | For each condition, 10 devices were tested for statistics.                                                                                                            |
| Statistical analysis of the device performance                                                                                                                                                | <input checked="" type="checkbox"/> Yes<br><input type="checkbox"/> No | The statistical analysis can be found in error bars of Fig. 8 and average performance data in Supplementary Table 2.                                                  |
| 9. Long-term stability analysis                                                                                                                                                               |                                                                        |                                                                                                                                                                       |
| Type of analysis, bias conditions and environmental conditions<br><i>For instance: illumination type, temperature, atmosphere humidity, encapsulation method, preconditioning temperature</i> | <input type="checkbox"/> Yes<br><input checked="" type="checkbox"/> No | As our current focus is on morphology evolution of organic solar cells based on reported systems, we did not carry out systematic study on long-term stability track. |
